# Supplementary material for: Performance of Targeted Library Preparation Solutions for SARS-CoV-2 Whole Genome Analysis
Source: MDPI journal article supplement (doi:10.3390/diagnostics10100769), 2020-09-29
Supplement: s1 [file s1]

**Supplementary materials Figure S1. Process scheme of time-consumption (in minutes) for library preparation by three approaches NEB+TWIST, Illumina and Paragon (extrapolation to 20 samples).** The calculation of time was performed based on the manufacturer’s manual and personal experience with workflow, including also relevant QC. First column reflect the particular steps of the workflow (grey rectangles); 2-4 column (NEB+TWIST, Illumina and Paragon) reflect the particular NGS library preparation steps with presented time consumptions (in minutes) related to particular QC (white rectangles with green border line) and workflow steps (white rectangles with grey border line).

|                                                                                                                                                                   | NEB+TWIST                                     | ILLUMINA                                            | PARAGON                                                 |
|-------------------------------------------------------------------------------------------------------------------------------------------------------------------|-----------------------------------------------|-----------------------------------------------------|---------------------------------------------------------|
| Number of samples<br>Sample quality requirement<br>Sample type                                                                                                    | 20<br>1-100 ng, RIN 2-7<br>SARS-Cov-2 RNA/DNA | 20<br>10 ng cDNA, RIN n.spec.<br>SARS-Cov-2 RNA/DNA | 20<br>50-100 ng cDNA, RIN n.spec.<br>SARS-Cov-2 RNA/DNA |
| Workflow in minutes                                                                                                                                               | hands on/instrument                           | hands on/instrument                                 | hands on/instrument                                     |
| QC: dCt of samples (qPCR)                                                                                                                                         | 30/90                                         | 30/90                                               | 30/90                                                   |
| Fragmentation<br>First Strand Synthesis<br>Second Strand Synthesis<br>Purification (beads)                                                                        | 5/3<br>20/40<br>20/60<br>20/-                 | 5/1 sec<br>20/60<br>20/60<br>20/-                   | -<br>20/95<br><br>20/-                                  |
| End Prep of cDNA Library<br>Adaptor Ligation<br>Tagmentation<br>Multiplex PCR reaction<br>Purification (beads)                                                    | 20/60<br>20/30<br>-/-<br>-/-<br>20/-          | -/-<br>-/-<br>10/5<br>-/-<br>20/-                   | -/-<br>-/-<br>-/-<br>20/65<br>20/-                      |
| PCR Enrich. of Adaptor Ligated DNA<br>Amplification of Tagmented DNA<br>Digestion Reaction<br>Purification (beads)<br>Second PCR Reaction<br>Purification (beads) | 20/23<br>-/-<br>-/-<br>20/-<br>-<br>-         | -/-<br>20/20<br>-/-<br>20/-<br>-<br>-               | -/-<br>-/-<br>20/10<br>20/-<br>20/50<br>20/-            |
| QC: Quantification of pre-enriched libraries (Qubit, ng/μl)                                                                                                       | 20/20                                         | 20/20                                               | 20/20                                                   |
| QC: Distribution of fragments of pre-enriched libraries (Bioanalyzer, bp)                                                                                         | 40/80                                         | 40/80                                               | 40/80                                                   |
| Plexing, concentrating, resuspending                                                                                                                              | 40/60                                         | 40/-                                                |                                                         |
| Hybridization                                                                                                                                                     | 20/960                                        | 20/960                                              |                                                         |
| Capturing of Hybridized Probes<br>Post-capture PCR amplification<br>Purification (beads)                                                                          | 20/20<br>30/20<br>20/-                        | 20/45<br>30/20<br>20/-                              |                                                         |
| QC: Quantification of post-enriched libraries (Qubit, ng/μl)                                                                                                      | 5/5                                           | 5/5                                                 |                                                         |
| QC: Distrib. of fragments of post-enriched libraries (Bioanalyzer, bp)                                                                                            | 10/40                                         | 10/40                                               |                                                         |
| TOTAL time (h, min)                                                                                                                                               | 6h 42min/26h 54min                            | 6h 6min/23h 24min                                   | 4h 12min/6h 30min                                       |
| TOTAL time (minus hybridisation)                                                                                                                                  | 6h 42min/10h 54min                            | 6h 6min/7h 24min                                    | -                                                       |
